# Supplementary material for: Statin therapy inhibits fatty acid synthase via dynamic protein modifications
Source: Research Square preprint supplement (doi:10.21203/rs.3.rs-465103/v1), 2021-05-07
Supplement: Supplementary file 1 [file 25607b0f8e64b1906667e41b.xlsx]

## Sheet: in vitro PRM precursor ions
Mass [m/z]	CS [z]	Peptide Sequence
934.945	2	HGVWAPNLHYHTPNPE
623.632	3	HGVWAPNLHYHTPNPE
387.224	2	AVQTLLE
497.257	2	LAFVGMLNE
1003.03	2	IAAVSPVAMPFRGYAVLGGE
793.406	2	ANVLPGAMAAVGLSWE
529.273	3	ANVLPGAMAAVGLSWE
531.309	2	FLQQLKRE
807.89	2	VRTGGIAFHSYFME
538.929	3	VRTGGIAFHSYFME
776.381	2	AQWQGSLARTFSAE
804.917	2	YSVNNLVSPVLFQE
685.383	2	ALQHVPAHAVVVE
457.258	3	ALQHVPAHAVVVE
411.709	2	FRLSQGD
606.819	2	YGPFFQLVLE
425.263	2	HLKPILE
617.32	2	NMASPKMKVVE
411.883	3	NMASPKMKVVE
436.266	2	LLKAGIQE
423.738	2	GARSLITE
653.356	3	ATQLGPVGGVFNLAMVLRD
942.517	2	LFLSQPHPVLSSFVLAE
628.68	3	LFLSQPHPVLSSFVLAE
910.759	3	VASINPDSTLVDLGLDS[+485.135878]LMGVE
379.232	2	VRQILE
424.239	2	LVLSMRE
922.929	2	LSSKTSTDADPATPTSHE
615.622	3	LSSKTSTDADPATPTSHE
477.287	2	ALIPLQGLE
470.746	2	GDHRTLLE

## Sheet: in cell PRM precursor ions
Mass [m/z]	CS [z]	Peptide Sequence
639.304	2	QGVTFPSGDIQE
673.354	2	TVTISGPQAPVFE
476.279	2	AIAPPLLQE
426.224	2	ALWHVPE
1117.07	2	LAAVNLDSSLADLGLDSLMSVE
745.047	3	LAAVNLDSSLADLGLDSLMSVE
900.428	3	LAAVNLDSSLADLGLDSLMS[+466.141298]VE
905.759	3	LAAVNLDSSLADLGLDSLM[+15.994915]S[+466.141298]VE
906.759	3	LAAVNLDSSLADLGLDSLMS[+485.135878]VE
912.091	3	LAAVNLDSSLADLGLDSLM[+15.994915]S[+485.135878]VE
541.826	2	ALLPLKGLEE
