# Supplementary material for: Statin therapy inhibits fatty acid synthase via dynamic protein modifications
Source: Research Square preprint supplement (doi:10.21203/rs.3.rs-465103/v1), 2021-05-07
Supplement: Supplementary file 2 [file 67d3803baa31638ab3632221.xlsx]

## Sheet: Breakdown from Figure 5
Pathways increasing during statin treatment and decreasing during hymeglusin treatment	Pathways unique to increasing during statin treatment	Pathways unique to decreasing during hymeglusin treatment			Pathways decreasing during statin treatment and increasing during hymeglusin treatment	Pathways unique to decreasing during statin treatment	Pathways unique to increasing during hymeglusin treatment		Pathways decreasing during both statin and hymeglusin treatments	Pathways increasing during both statin and hymeglusin treatments
[1] "COPII-coated vesicle budding "	[1] "steroid biosynthetic process "	[1] "protein complex assembly "			[1] "DNA repair "	[1] "heterochromatin "	"chromatin silencing at rDNA "		[1] "nuclear chromatin "	[1] "cholesterol biosynthetic process "
[2] "snRNA transcription "	[2] "sterol metabolic process "	[2] "Golgi-associated vesicle "				[2] "U1 snRNP "	[2] "intra-Golgi vesicle-mediated transport "		[2] "nuclear chromosome part "	[2] "secondary alcohol biosynthetic process "
[3] "snRNA transcription from RNA polymerase II promoter "	[3] "secretory granule lumen "	[3] "microtubule cytoskeleton "				[3] "U4 snRNP "	[3] "positive regulation of gene expression, epigenetic "		[3] "chromatin "	[3] "sterol biosynthetic process "
	[4] "regulation of phosphatase activity "	[4] "endoplasmic reticulum-Golgi intermediate compartment membrane "				[4] "methylosome "	[4] "transcription elongation from RNA polymerase II promoter "		[4] "histone modification "	[4] "cholesterol metabolic process "
	[5] "secretory vesicle "	[5] "vesicle coating "				[5] "protein methylation "	[5] "regulation of transcription elongation from RNA polymerase II promoter "		[5] "spindle microtubule "	[5] "regulation of cholesterol biosynthetic process "
	[6] "regulation of primary metabolic process "	[6] "COPII vesicle coating "				[6] "protein-arginine omega-N asymmetric methyltransferase activity "	[6] "membrane fusion "		[6] "mRNA splicing, via spliceosome "	[6] "regulation of cholesterol metabolic process "
	[7] "organic hydroxy compound biosynthetic process "	[7] "vesicle targeting, rough ER to cis-Golgi "				[7] "histone-arginine N-methyltransferase activity "	[7] "histone monoubiquitination "		[7] "RNA splicing, via transesterification reactions with bulged adenosine as nucleophile "	[7] "regulation of alcohol biosynthetic process "
	[8] "cellular protein modification process "	[8] "mRNA metabolic process "				[8] "negative regulation of cAMP-mediated signaling "	[8] "negative regulation of gene expression, epigenetic "		[8] "RNA metabolic process "	[8] "regulation of steroid biosynthetic process "
	[9] "ER to Golgi transport vesicle membrane "	[9] "endoplasmic reticulum-Golgi intermediate compartment "				[9] "histone methylation "	[9] "DNA-templated transcription, elongation "		[9] "RNA processing "	[9] "lipid biosynthetic process "
	[10] "nucleotide-excision repair "	[10] "trans-Golgi network transport vesicle "				[10] "peptidyl-arginine methylation, to asymmetrical-dimethyl arginine "	[10] "regulation of myeloid cell differentiation "		[10] "precatalytic spliceosome "	[10] "isoprenoid biosynthetic process "
	[11] "U2-type catalytic step 2 spliceosome "	[11] "Rho GTPase binding "				[11] "peptidyl-arginine methylation "			[11] "spliceosomal complex "	[11] "acetyl-CoA metabolic process "
	[12] "neutrophil degranulation "	[12] "coated vesicle "				[12] "peptidyl-arginine omega-N-methylation "			[12] "nucleic acid metabolic process "
	[13] "neutrophil activation involved in immune response "	[13] "COPII-coated ER to Golgi transport vesicle "				[13] "Golgi vesicle budding "
	[14] "neutrophil mediated immunity "	[14] "regulation of cell growth "				[14] "translation "
	[15] "vacuolar transport "	[15] "histone acetyltransferase complex "				[15] "protein-arginine N-methyltransferase activity "
	[16] "membrane invagination "	[16] "spindle "				[16] "ribonucleoprotein complex assembly "
	[17] "focal adhesion "	[17] "mitochondrion "				[17] "small nuclear ribonucleoprotein complex "
	[18] "cytosolic proteasome complex "	[18] "retina homeostasis "				[18] "nuclear heterochromatin "
	[19] "transcription-coupled nucleotide-excision repair "	[19] "microtubule organizing center "				[19] "U2 snRNP "
	[20] "isoprenoid metabolic process "					[20] "microtubule end "
	[21] "azurophil granule lumen "					[21] "prespliceosome "
	[22] "early endosome "					[22] "U5 snRNP "
	[23] "regulation of phosphoprotein phosphatase activity "					[23] "peptidyl-arginine modification "
	[24] "vacuolar lumen "					[24] "histone arginine methylation "
	[25] "regulation of receptor-mediated endocytosis "					[25] "nuclear-transcribed mRNA catabolic process "
	[26] "phospholipid biosynthetic process "					[26] "cellular response to DNA damage stimulus "
	[27] "organic cyclic compound biosynthetic process "					[27] "translational termination "
	[28] "DNA replication-dependent nucleosome organization "					[28] "protein targeting to peroxisome "
	[29] "DNA replication-dependent nucleosome assembly "					[29] "spliceosomal snRNP assembly "
	[30] "regulation of protein dephosphorylation "					[30] "U12-type spliceosomal complex "
	[31] "positive regulation of receptor-mediated endocytosis "					[31] "spliceosomal snRNP complex "
	[32] "negative regulation of receptor binding "					[32] "U2-type spliceosomal complex "
						[33] "histone H2A ubiquitination "
						[34] "protein methyltransferase activity "
						[35] "spliceosomal complex assembly "
						[36] "regulation of cAMP-mediated signaling "
						[37] "spliceosomal tri-snRNP complex "
						[38] "nuclear-transcribed mRNA catabolic process, nonsense-mediated decay "
						[39] "microtubule "
						[40] "DNA metabolic process "
						[41] "regulation of mitotic cell cycle "
						[42] "mitochondrial inner membrane "
						[43] "histone methyltransferase activity "
						[44] "protein K48-linked ubiquitination "
						[45] "protein autoubiquitination "
						[46] "peroxisome organization "
						[47] "peptide biosynthetic process "
						[48] "peroxisomal membrane transport "
						[49] "ncRNA processing "
						[50] "protein polyubiquitination "
						[51] "DNA replication initiation "
						[52] "cytosolic ribosome "
						[53] "SRP-dependent cotranslational protein targeting to membrane "

## Sheet: Breakdown from Figure 6
Pathways increasing during both statin and metformin treatment while decreasing during hymeglsuin	Pathways uniquely increasing during both statin and metformin treatment	Pathways uniquely decreasing during hymeglusin treatment			Pathways decreasing during both statin and metformin treatment while increasing during hymeglsuin	Pathways uniquely decreasing during both statin and metformin treatment	Pathways uniquely decreasing during hymeglusin treatment		Pathways decreasing in all three conditions	Pathways increasing in all three conditions
(none)	[1] "secretory granule lumen"	[1] "protein complex assembly "			[1] "DNA repair "	[1] "cellular response to DNA damage stimulus " "histone H2A ubiquitination "	[1] "chromatin silencing at rDNA "		[1] "nuclear chromatin " "nuclear chromosome part "	(none)
	[2] "neutrophil degranulation "	[2] "Golgi-associated vesicle "				[3] "microtubule " "DNA metabolic process "	[2] "intra-Golgi vesicle-mediated transport "		[3] "chromatin " "histone modification "
	[3] "neutrophil activation involved in immune response "	[3] "endoplasmic reticulum-Golgi intermediate compartment membrane "				[5] "regulation of mitotic cell cycle "	[3] "positive regulation of gene expression, epigenetic "		[5] "spindle microtubule " "RNA metabolic process "
	[4] "neutrophil mediated immunity "	[4] "vesicle coating "					[4] "transcription elongation from RNA polymerase II promoter "		[7] "nucleic acid metabolic process "
	[5] "focal adhesion "	[5] "COPII vesicle coating "					[5] "regulation of transcription elongation from RNA polymerase II promoter "
		[6] "vesicle targeting, rough ER to cis-Golgi "					[6] "membrane fusion "
		[7] "mRNA metabolic process "					[7] "negative regulation of gene expression, epigenetic "
		[8] "endoplasmic reticulum-Golgi intermediate compartment "					[8] "DNA-templated transcription, elongation "
		[9] "trans-Golgi network transport vesicle "					[9] "regulation of myeloid cell differentiation "
		[10] "Rho GTPase binding "
		[11] "coated vesicle "
		[12] "COPII-coated ER to Golgi transport vesicle "
		[13] "regulation of cell growth "
		[14] "mitochondrion "
		[15] "retina homeostasis "
